# Supplementary material for: A highly conductive, flexible, transparent composite electrode based on the lamination of silver nanowires and polyvinyl alcohol
Source: Royal Society of Chemistry journal article supplement (doi:10.1039/c4tc01484g), 2014-01-01
Supplement: c4tc01484g1.pdf [file c4tc01484g1.pdf]

## Supporting information

### A Highly Conductive, Flexible Transparent Composite Electrode Based on the Lamination of Silver nanowires and Polyvinyl Alcohol

Xin He\*, Ruihui He, A'lei Liu, Xiangyuan Chen, Zhilong Zhao, Sheng Feng, Ning Chen and Mei Zhang

*School of Applied Physics and Materials, Wuyi University, Jiangmen 529020, People's Republic China*

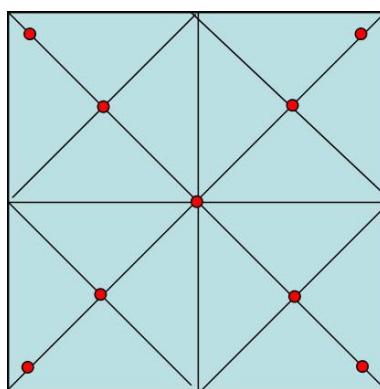

Fig. S1 Schematic drawing of the location of nine representative points. The sheet resistances for the films were measured at nine representative points marked by red circles, and the final values were averaged.

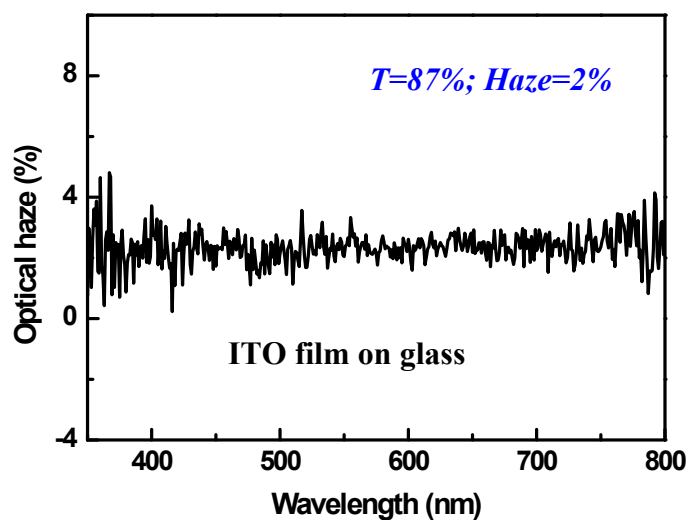

\* Corresponding author. Tel. +86 750 3296393; Fax: +86 750 3296400.  
E-mail address: [hexinwyu@126.com](mailto:hexinwyu@126.com) (X. He)

Fig. S2 Relative plot of optical haze *versus* wavelength of ITO film on glass with the transmittance of 87%.

### Calculation of the standard deviation and standard error

The standard deviations (SD) of the sheet resistance for the conductive films were calculated

using a formula  $SD = \sqrt{\frac{\sum_{i=1}^n (x_i - \bar{x})^2}{n-1}}$ , and the standard errors (SE) were determined using a formula

$SE = \frac{SD}{\sqrt{n}}$ . The percentage of SE was evaluated using a formula  $\frac{SE}{R} \times 100\%$ , where  $R$  is the

average sheet resistance of the film.

Table S1 List of the increased ratio of the sheet resistance for the composite films after 90 and 180 days of storage.

| Mechanical laminating pressure<br>(MPa) | Increased ratio of $R_s$ after 90<br>days | Increased ratio of $R_s$ after 180<br>days |
|-----------------------------------------|-------------------------------------------|--------------------------------------------|
| 10                                      | 3.65                                      | 268.3                                      |
| 20                                      | -0.18                                     | 68.6                                       |
| 30                                      | 1.85                                      | 138.0                                      |
| 40                                      | 0.09                                      | 61.8                                       |
| 50                                      | 1.13                                      | 106.5                                      |
| 60                                      | 2.79                                      | 104.5                                      |

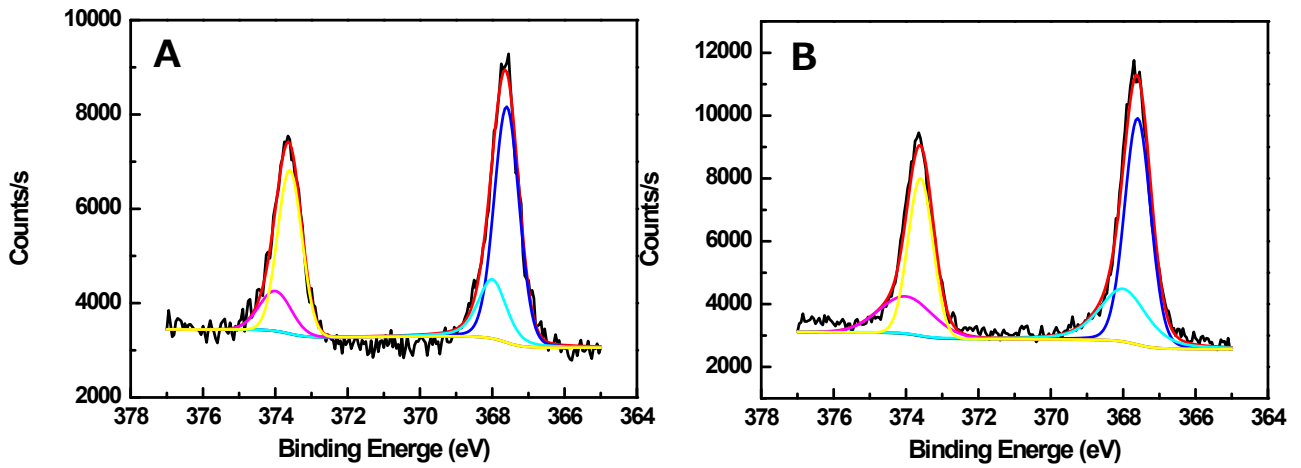

Fig. S3 Ag 3d XPS spectra for the composite films laminated using the pressure of 10 MPa (A) and 60 MPa (B) after 180 days of storage.

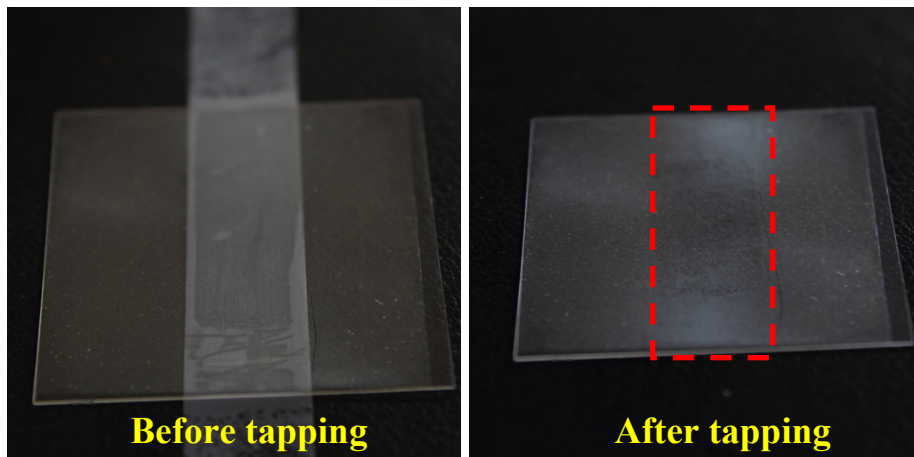

Fig. S4 Photography of the composite film before (left) and after tapping (right); the red dotted rectangle is the tapping area, indicating that the Ag NWs were hardly detached by the 3M Scotch tape.
